# Supplementary material
Source: PubMed Central journal article supplement (PMC6239903)
Supplement: NIHMS1503109-supplement-1.pdf [file NIHMS1503109-supplement-1.pdf]

| Supplemental Table 1. Epidemiological characteristics among 4,283 white and 615 black women with endometrial carcinoma in the NRG Oncology/GOG 210 Study |                          |             |                |
|----------------------------------------------------------------------------------------------------------------------------------------------------------|--------------------------|-------------|----------------|
|                                                                                                                                                          | Race, n (%) <sup>1</sup> |             |                |
|                                                                                                                                                          | White                    | Black       | p <sup>2</sup> |
|                                                                                                                                                          | n=4,283                  | n=615       |                |
| <b>Age at diagnosis</b>                                                                                                                                  |                          |             | 0.66           |
| <54                                                                                                                                                      | 846 (19.8)               | 118 (19.2)  |                |
| 55-59                                                                                                                                                    | 806 (18.8)               | 99 (16.1)   |                |
| 60-64                                                                                                                                                    | 786 (18.4)               | 117 (19.0)  |                |
| 65-69                                                                                                                                                    | 673 (15.7)               | 122 (19.8)  |                |
| ≥70                                                                                                                                                      | 1172 (27.4)              | 159 (25.9)  |                |
| Median (interquartile range)                                                                                                                             | 63 (56, 70)              | 63 (57, 70) |                |
| <b>Education</b>                                                                                                                                         |                          |             | <.0001         |
| Less than high school                                                                                                                                    | 415 (9.7)                | 137 (22.3)  |                |
| High school/GED                                                                                                                                          | 1403 (32.8)              | 158 (25.7)  |                |
| Some college/technical school                                                                                                                            | 1186 (27.7)              | 189 (30.7)  |                |
| College graduate/beyond                                                                                                                                  | 1268 (29.6)              | 123 (20.0)  |                |
| <b>Income</b>                                                                                                                                            |                          |             | <.0001         |
| < \$20,000                                                                                                                                               | 817 (19.1)               | 258 (42.0)  |                |
| \$20,000-\$39,999                                                                                                                                        | 940 (22.0)               | 130 (21.1)  |                |
| \$40,000-\$69,999                                                                                                                                        | 1019 (23.8)              | 102 (16.6)  |                |
| ≥\$70,000                                                                                                                                                | 1009 (23.6)              | 53 (8.6)    |                |
| <b>Age at menarche</b>                                                                                                                                   |                          |             | 0.006          |
| ≤11                                                                                                                                                      | 901 (21.0)               | 138 (22.4)  |                |
| 12                                                                                                                                                       | 1256 (29.3)              | 147 (23.9)  |                |
| 13                                                                                                                                                       | 1131 (26.4)              | 139 (22.6)  |                |
| ≥14                                                                                                                                                      | 884 (20.6)               | 151 (24.6)  |                |
| <b>Parity</b>                                                                                                                                            |                          |             | <.0001         |
| Nulliparous                                                                                                                                              | 810 (18.9)               | 71 (11.5)   |                |
| 1-2                                                                                                                                                      | 1797 (42.0)              | 200 (32.5)  |                |
| ≥3                                                                                                                                                       | 1542 (36.0)              | 310 (50.4)  |                |
| <b>BMI 1 year ago, kg/m<sup>2</sup></b>                                                                                                                  |                          |             | <.0001         |
| Normal (< 25 kg/m <sup>2</sup> )                                                                                                                         | 944 (22.0)               | 33 (5.4)    |                |
| Overweight (25-30 kg/m <sup>2</sup> )                                                                                                                    | 951 (22.2)               | 86 (14.0)   |                |
| Obese (≥ 30 kg/m <sup>2</sup> )                                                                                                                          | 1956 (45.7)              | 356 (57.9)  |                |
| <b>Smoking status</b>                                                                                                                                    |                          |             | 0.07           |
| Never                                                                                                                                                    | 2714 (63.4)              | 413 (67.2)  |                |
| Current                                                                                                                                                  | 282 (6.6)                | 32 (5.2)    |                |
| Former                                                                                                                                                   | 1191 (27.8)              | 149 (24.2)  |                |
| <b>Diabetes</b>                                                                                                                                          |                          |             | <.0001         |
| Never                                                                                                                                                    | 3266 (76.3)              | 391 (63.6)  |                |
| Ever                                                                                                                                                     | 824 (19.2)               | 177 (28.8)  |                |

|                                                                                               |             |            |        |
|-----------------------------------------------------------------------------------------------|-------------|------------|--------|
| <b>Oral contraceptive use</b>                                                                 |             |            | 0.09   |
| Never                                                                                         | 1831 (42.8) | 232 (37.7) |        |
| Ever                                                                                          | 2341 (54.7) | 346 (56.3) |        |
| <b>Menopausal status</b>                                                                      |             |            | 0.77   |
| Premenopausal                                                                                 | 372 (8.7)   | 50 (8.1)   |        |
| Postmenopausal                                                                                | 3818 (89.1) | 537 (87.3) |        |
| <b>Menopausal hormone use</b>                                                                 |             |            | <.0001 |
| Never                                                                                         | 2882 (67.3) | 527 (85.7) |        |
| Estrogen only                                                                                 | 329 (7.7)   | 38 (6.2)   |        |
| Progestin only                                                                                | 181 (4.2)   | 12 (2.0)   |        |
| Estrogen + progestin                                                                          | 849 (19.8)  | 34 (5.5)   |        |
| <b>Tamoxifen use</b>                                                                          |             |            | 0.17   |
| Never                                                                                         | 3933 (91.8) | 550 (89.4) |        |
| Ever                                                                                          | 199 (4.7)   | 20 (3.3)   |        |
| <b>History of breast cancer</b>                                                               |             |            | 0.22   |
| Never                                                                                         | 3857 (90.1) | 551 (89.6) |        |
| Ever                                                                                          | 331 (7.7)   | 38 (6.2)   |        |
| 1 Numbers may not sum to total because of missing data                                        |             |            |        |
| 2 P value was from two-sided $\chi^2$ test among women with non-missing data for the variable |             |            |        |
| 3 Among patients for whom the procedure was performed                                         |             |            |        |
